# Supplementary material for: Longevity and efficacy of lanthanum-based P remediation under changing dissolved oxygen availability in a small eutrophic lake
Source: Royal Society of Chemistry journal article supplement (doi:10.1039/d3em00572k), 2024-01-01
Supplement: d3em00572k1.pdf [file d3em00572k1.pdf]

Supplementary material for manuscript “Longevity and efficacy of lanthanum-based P remediation under changing dissolved oxygen availability in a small eutrophic lake”.

Wessam Neweshy<sup>1</sup>, Dolores Planas<sup>2</sup>, Nicole Sanderson<sup>2</sup> and Raoul-Marie Couture<sup>1,\*</sup>

\* Correspondance : [Raoul.couture@chm.ulaval.ca](mailto:Raoul.couture@chm.ulaval.ca)

- 1- Département de Chimie, Université Laval, Canada and GRIL (Interuniversity Research Group in Limnology).
- 2- Département de Sciences Biologiques, Université de Québec à Montréal, Canada and GRIL (Interuniversity Research Group in Limnology).
- 3- Département de Géographie, Université du Québec à Montréal, Canada and Centre de recherche en géochimie et géodynamique (GEOTOP).

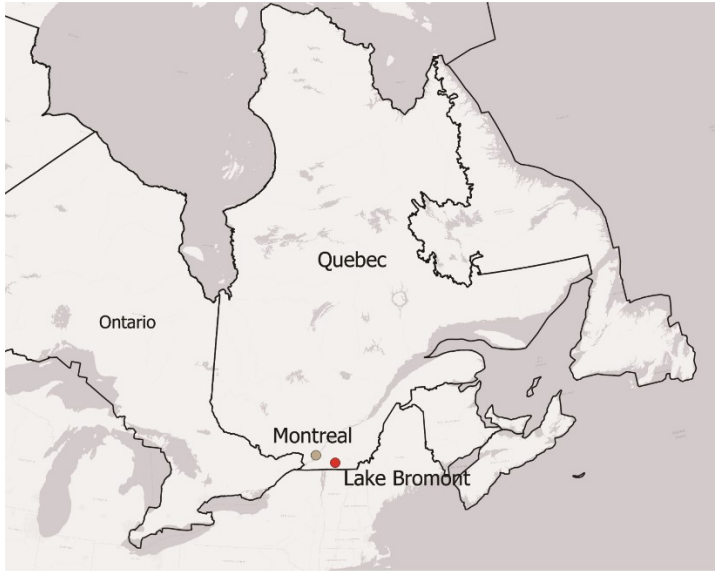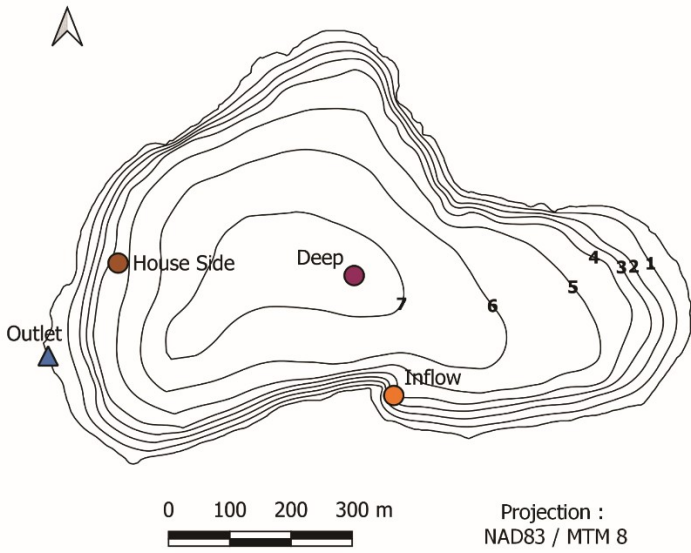

**Figure S1.** Location and bathymetry of Lake Bromont, along with sampling site locations (circles) and lake outlet (triangle).

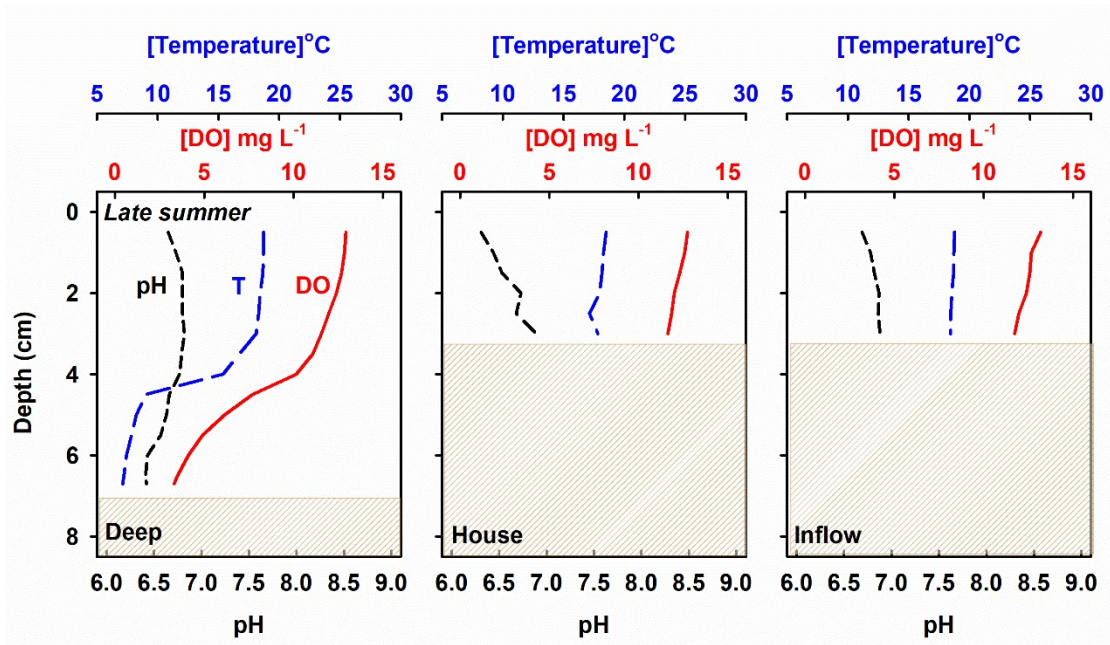

**Figure**

**e S2.** Water temperature (long dashed lines) , dissolved oxygen (solid lines), and pH measurements (short dashed lines) in the water columns of lake Bromont in the Deep, House and Inflow sites during late summer.

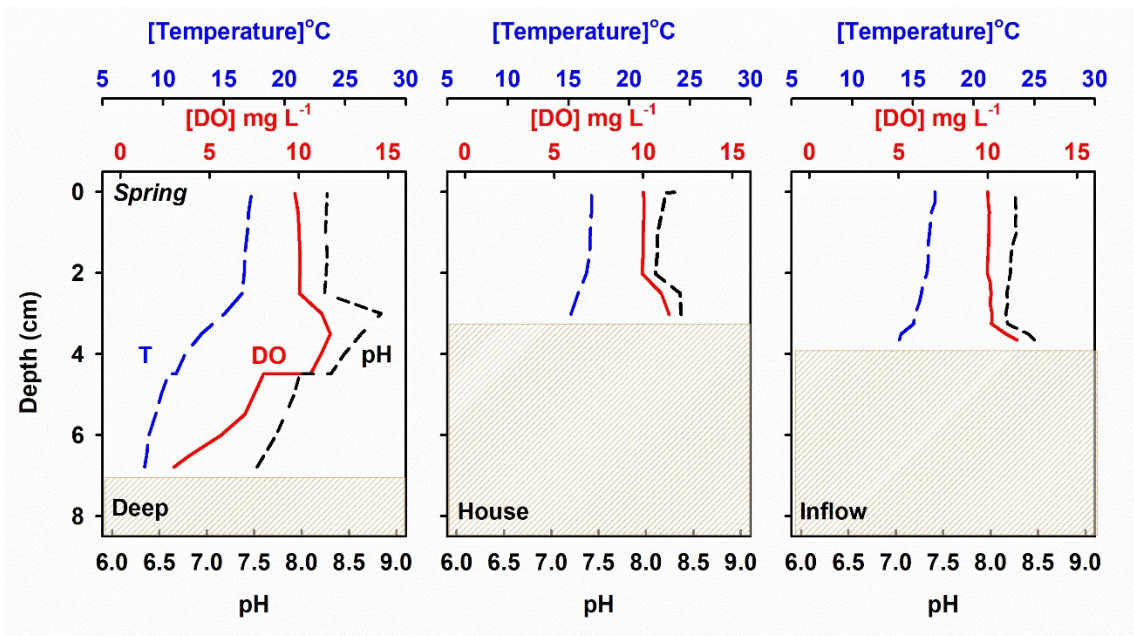

**Figure S3.** Water temperature (long-dashed lines), dissolved oxygen (solid lines), and pH measurements (short-dashed lines) in the water columns of lake Bromont in the Deep, House and Inflow sites during spring.

**Table S1:** Net reaction rates for P estimated by PROFILE at the Deep, House, and Inflow sites in the summer and spring seasons.

| Site   | Season | Zone nr. | Depth interval (cm)   | $R_{net}^P$<br>( $\mu\text{M cm}^{-3} \text{s}^{-1}$ ) |
|--------|--------|----------|-----------------------|--------------------------------------------------------|
| Deep   | Summer | 1        | 0–2                   | $4.66 \times 10^{-8}$                                  |
|        |        | 2        | 2–12                  | $-1.48 \times 10^{-9}$                                 |
|        | Spring | 1        | 0–2.8                 | $3.25 \times 10^{-10}$                                 |
|        |        | 2        | 2.8–8.3               | $-1.08 \times 10^{-10}$                                |
|        |        | 3        | 8.3–10                | $1.35 \times 10^{-10}$                                 |
|        | House  | Summer   | 1                     | 0–1                                                    |
| 2      |        |          | 1.3–2.7               | $2.36 \times 10^{-8}$                                  |
| 3      |        |          | 2.7–12                | $-7.54 \times 10^{-10}$                                |
| Spring |        | 1        | 0–6                   | $-8.96 \times 10^{-10}$                                |
|        |        | 2        | 6–12                  | $8.72 \times 10^{-10}$                                 |
|        |        |          |                       |                                                        |
| Inflow | Summer | 1        | 0–6                   | $3.77 \times 10^{-9}$                                  |
|        |        | 2        | 6–12                  | $2.40 \times 10^{-10}$                                 |
|        | Spring | 1        | 0–3.7                 | $5.56 \times 10^{-9}$                                  |
|        |        | 2        | 3.7–5.5               | $-2.10 \times 10^{-8}$                                 |
|        |        | 3        | 5.5–7.3               | $3.67 \times 10^{-8}$                                  |
|        |        | 4        | 7.3–9.2               | $-5.36 \times 10^{-8}$                                 |
|        | 5      | 9.2–11   | $5.87 \times 10^{-8}$ |                                                        |

**Table S2:** Net reaction rates for La estimated by PROFILE at the Deep, House, and Inflow sites in the summer and spring seasons.

| <b>Site</b>   | <b>Season</b> | <b>Zone nr.</b>         | <b>Depth interval (cm)</b> | <b><math>R_{net}^{La}</math> (<math>\mu\text{M cm}^{-3} \text{s}^{-1}</math>)</b> |
|---------------|---------------|-------------------------|----------------------------|-----------------------------------------------------------------------------------|
| <b>Deep</b>   | <i>Summer</i> | 1                       | 0-6                        | $1.34 \times 10^{-15}$                                                            |
|               |               | 2                       | 6-12                       | $-7.78 \times 10^{-16}$                                                           |
|               | <i>Spring</i> | 1                       | 0-8.6                      | $-8.43 \times 10^{-17}$                                                           |
|               |               | 2                       | 8.6-10                     | $4.29 \times 10^{-15}$                                                            |
| <b>House</b>  | <i>Summer</i> | 1                       | 0-7.2                      | $5.52 \times 10^{-16}$                                                            |
|               |               | 2                       | 7.2-12                     | $-3.52 \times 10^{-16}$                                                           |
|               | <i>Spring</i> | 1                       | 0-1.5                      | $4.91 \times 10^{-15}$                                                            |
|               |               | 2                       | 1.5-12                     | $-3.57 \times 10^{-16}$                                                           |
| <b>Inflow</b> | <i>Summer</i> | 1                       | 0-8                        | $6.48 \times 10^{-16}$                                                            |
|               |               | 2                       | 8-12                       | $-6.99 \times 10^{-16}$                                                           |
|               | <i>Spring</i> | 1                       | 0-2.2                      | $-9.88 \times 10^{-16}$                                                           |
|               |               | 2                       | 2.2-3.3                    | $6.03 \times 10^{-15}$                                                            |
|               |               | 3                       | 3.3-5.5                    | $-4.05 \times 10^{-15}$                                                           |
|               |               | 4                       | 5.5-6.6                    | $7.15 \times 10^{-15}$                                                            |
| 5             | 6.6-11        | $-1.04 \times 10^{-15}$ |                            |                                                                                   |

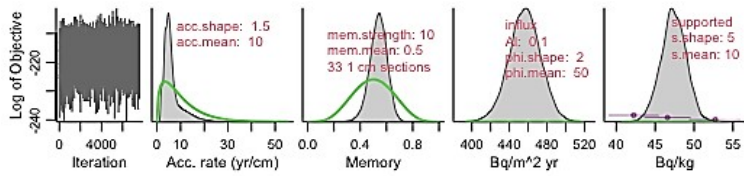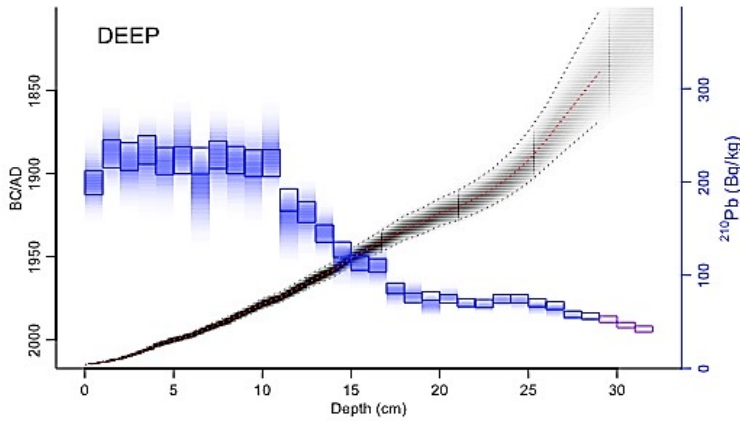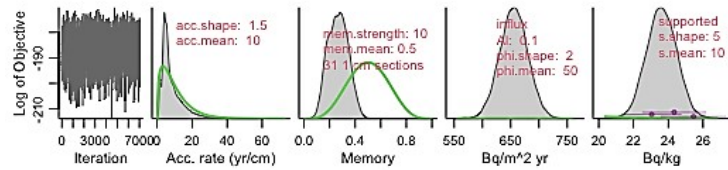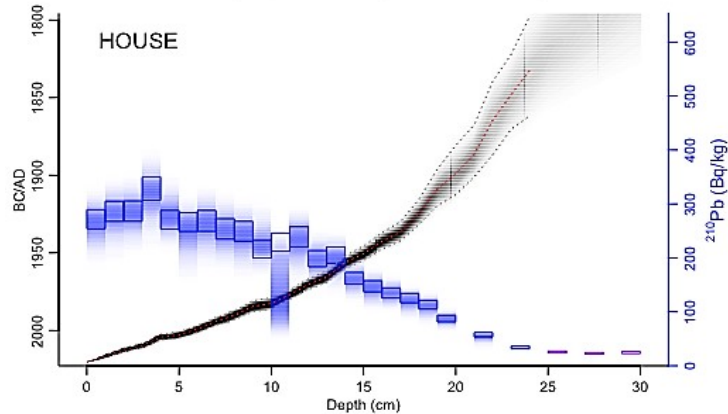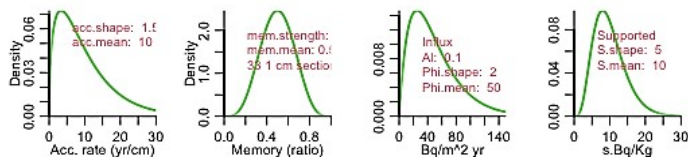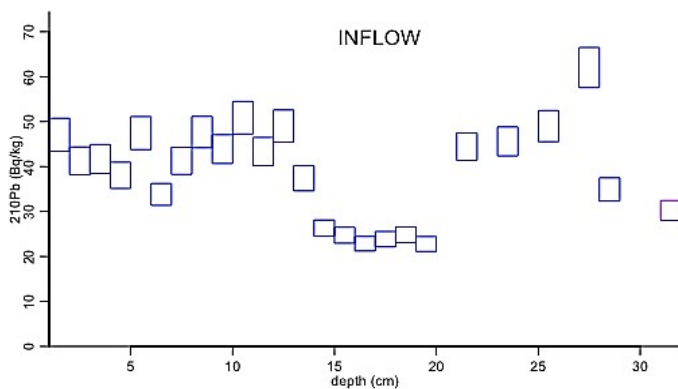

**Figure S4.** Output of the PLUM model for  $^{210}\text{Pb}$  activity and age estimation modelling at the Deep, House, and Inflow sites. Upper panels represent the prior (green) and posterior (gray) distribution of the model's parameters, with accumulation rates (yr/cm) being shown on the 2<sup>nd</sup> panel from the left. The red text indicates prior parameter values.
